# Supplementary material
Source: PubMed Central journal article supplement (PMC3636693)
Supplement: supp_0022155412466872_JHC466872_Supplemental_Material.pdf [file supp_0022155412466872_JHC466872_Supplemental_Material.pdf]

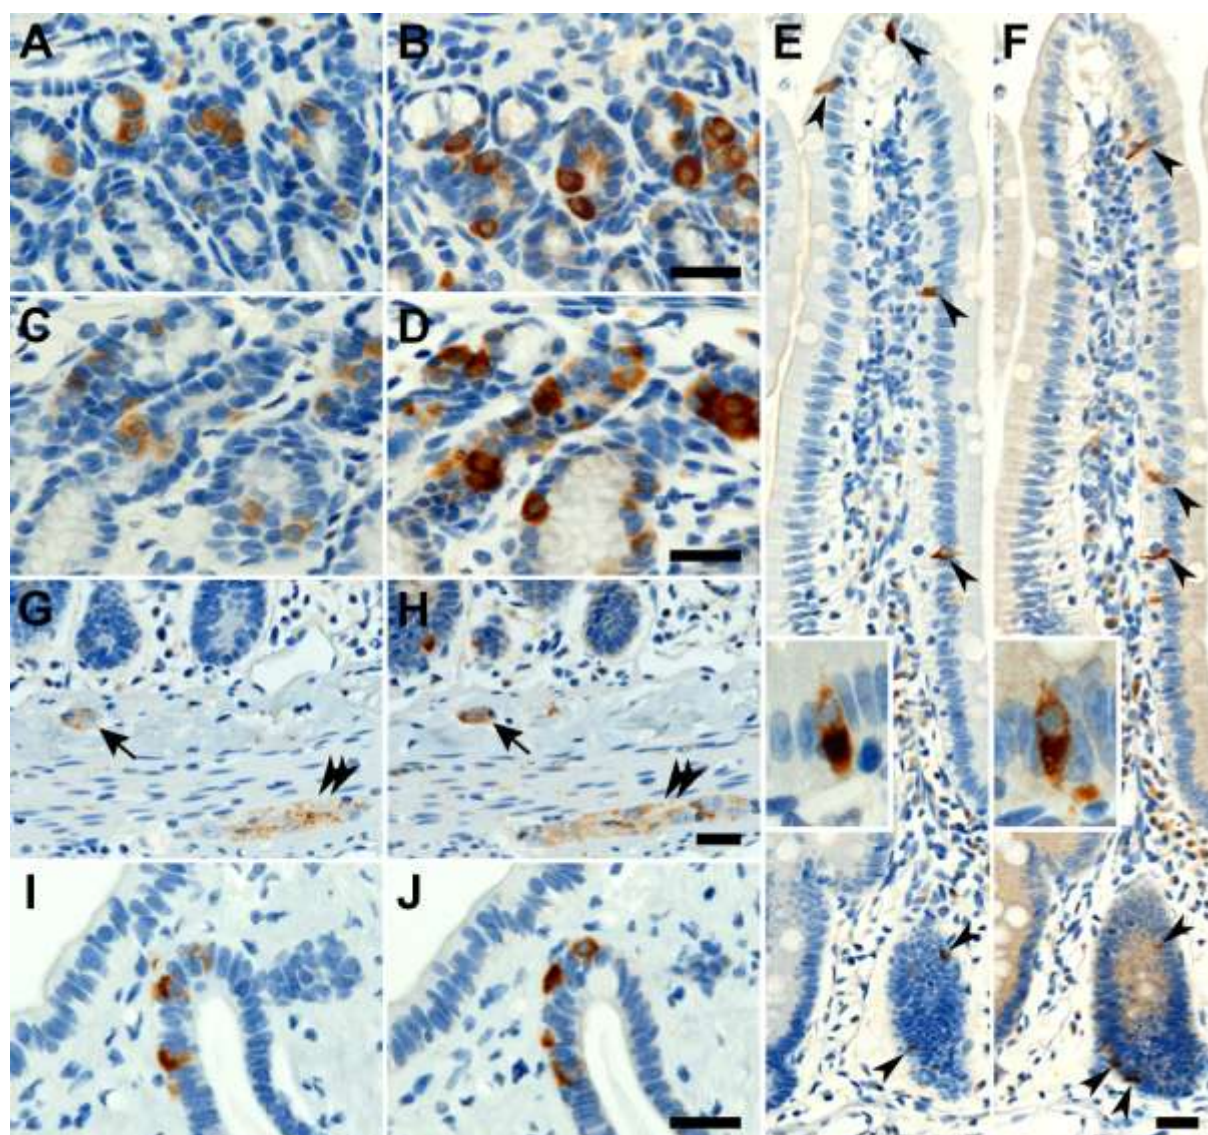

**Figure S1**

Supplemental Figure 1. The localization of the IA-2 family of PTPs in rat gastrointestinal tissues

Serial paraffin sections of the stomach (A–D), duodenum (E–H), and pancreatic exocrine duct (I and J). The sections were stained with anti-IA-2 (A, C, E, G, and I) or anti-IA-2β (B, D, F, H, and J) antibodies. IA-2- and IA-2β-positive cells in the duodenal crypts and villi are

indicated by arrows; the insets show high-magnification pictures of GECs located in the intestinal villi (E and F). Double arrowheads and arrows indicate the myenteric and submucosal plexuses in the duodenal tunica muscularis, respectively (G and H, respectively). Sections were counterstained with hematoxylin. Bars, 20  $\mu$ m.
